# Supplementary material for: Regulation of Primary Metabolic Pathways in Oyster Mushroom Mycelia Induced by Blue Light Stimulation: Accumulation of Shikimic Acid
Source: PubMed Central journal article supplement (PMC4342562; doi:10.1038/srep08630), 2015-02-27
Supplement: srep08630-s1.pdf [file srep08630-s1.pdf]

***Regulation of Primary Metabolic Pathways in Oyster Mushroom  
Mycelia Induced by Blue Light Stimulation:  
Accumulation of Shikimic Acid***

**Masanobu Kojima\*, Ninako Kimura & Ryuhei Miura**

Department of Bioscience and Biotechnology, Shinshu University, Kamiina, Nagano  
399-4598, Japan.

\*Correspondence and requests for materials should be addressed to M.K.

([mkojima@shinshu-u.ac.jp](mailto:mkojima@shinshu-u.ac.jp)).

## **Legends:**

**Supplementary Fig. S1.** HPLC analysis of shikimic acid in oyster mushroom mycelia cultivated in the dark (before irradiation) and under blue light stimulation for 24 h.

**Supplementary Fig. S2.** Comprehensive analysis of gene expression in oyster mushroom mycelia after blue light stimulation using a custom microarray: PFD,  $150 \mu\text{mol m}^{-2} \text{s}^{-1}$ ; stimulation time, 0, 0.5, 1, 3, 6, 12, 24 and 36 h. **a–h.** Altered transcripts were quantified using the comparative method. Genes with greater than or equal to 2-fold changes in signal intensity were used to identify significant differences in gene expression. Differentially expressed genes were also subjected to K-means analysis and were classified into eight clusters (I–VIII). Total number of genes (TNG) categorized in each cluster is shown in **a–h.**

**Supplementary Fig. S3.** HCA of the time course of gene expression related to aromatic amino acid biosynthesis, glycolysis/gluconeogenesis and the pentose phosphate pathway.

**Supplementary Fig. S4.** Glycolysis pathway. EC2.7.1.11 (PFK) is a rate-determining enzyme.

**Supplementary Fig. S5.** Pentose phosphate pathway. EC1.1.1.49 (G6PD) is a rate-determining enzyme.

**Supplementary Fig. S6.** Time course of the expression levels of the rate-determining enzymes as detected by antibody response. The expression levels of the enzymes were analyzed using ImageJ software; n = 3; error bar = SD.

**Supplementary Table S1.** HCA of the time course induction of 212 primary metabolites by blue light stimulation

**Supplementary Table S2.** Probe names of genes represented in the custom microarray, EC number and the KEGG Orthology (KO) ID of the corresponding protein

**Supplementary Table S3.** Forward and reverse primers synthesized for quantitative PCR analysis

**Supplementary Table S4.** Peptides synthesized for preparation of polyclonal primary antibodies against the target proteins

Before irradiation

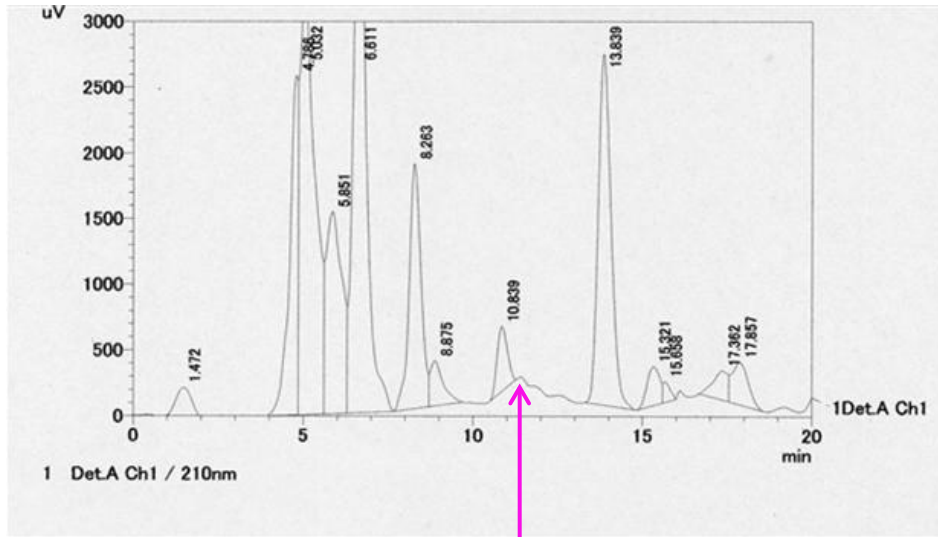

Analysis Conditions:

Column: Inertsil HILIC (GL Sciences Ltd.)

Particle Size: 5  $\mu$ m

Length:  $\Phi$ 4.6 x 250 mm

Detection UV Wavelength: 210 nm

Mobile Phase: 1%  $H_3PO_4$ /MeCN = 10/90

Flow Rate: 0.6 ml/min

Oven Temp.: 30°C

Injection Amount: 10  $\mu$ L

Retention Time of Shikimic Acid: 11.5 min

After blue light stimulation for 24 h

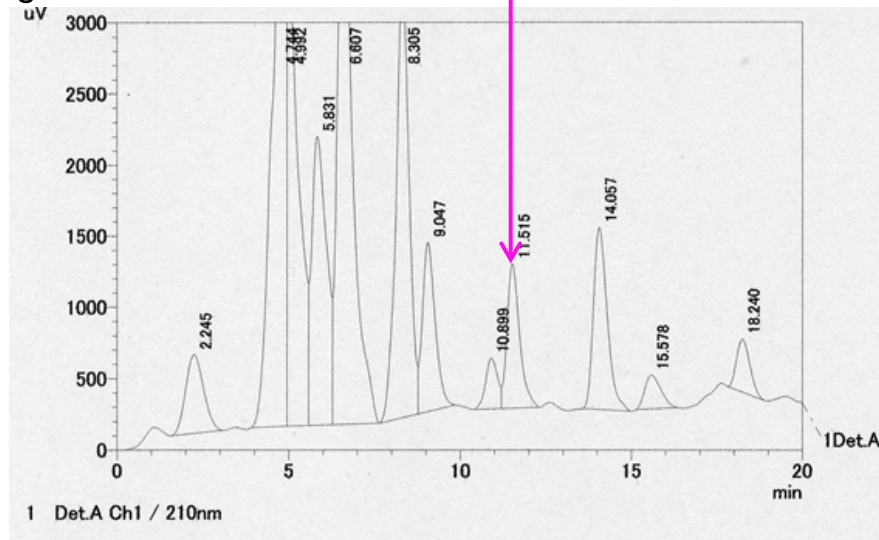

Supplementary Fig. S1

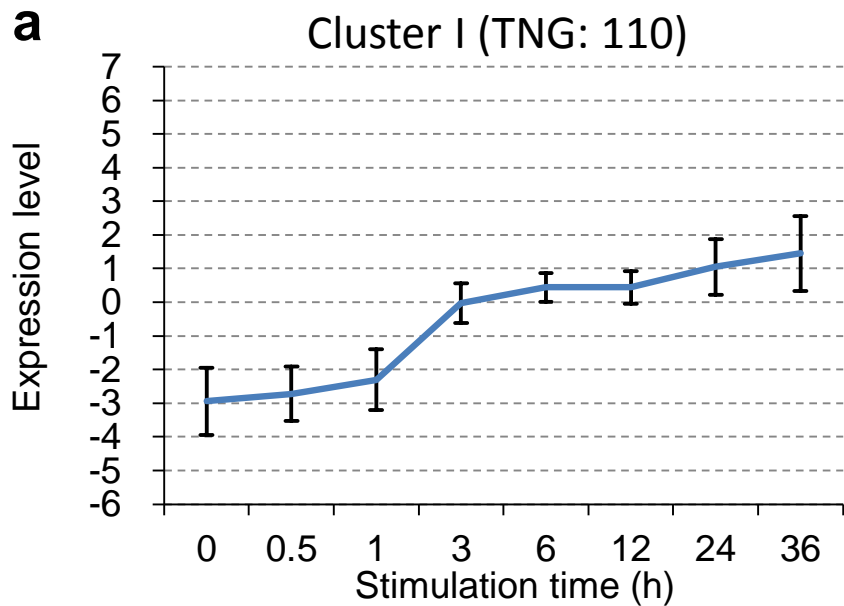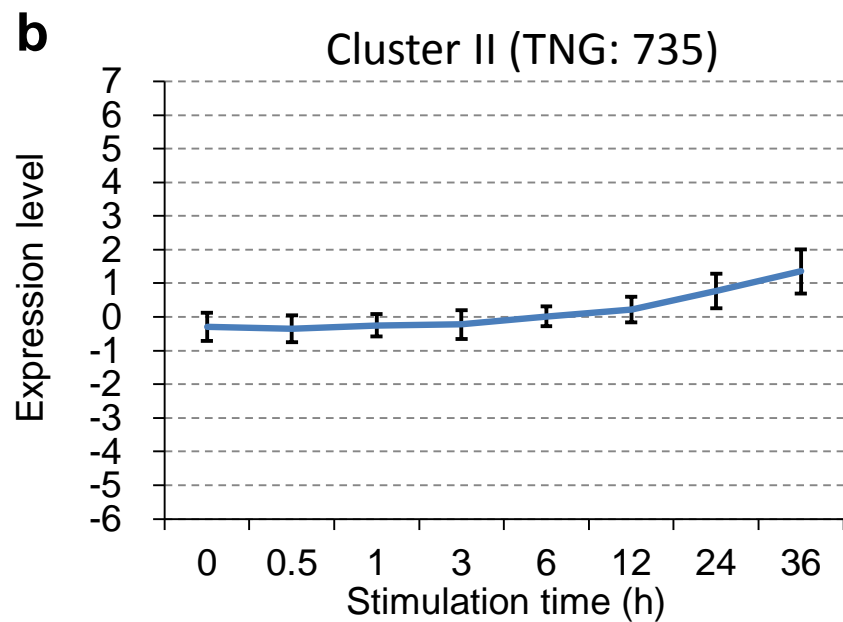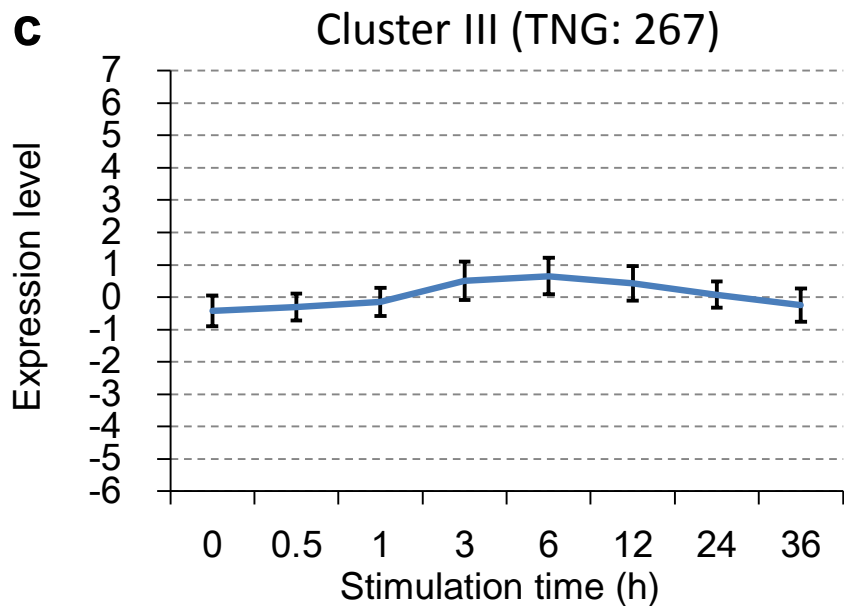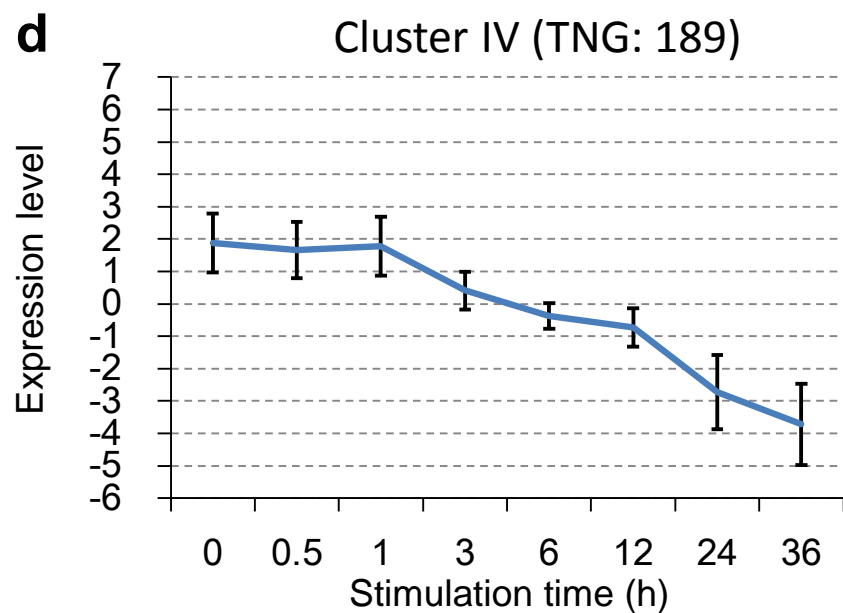

Supplementary Fig. S2a-d

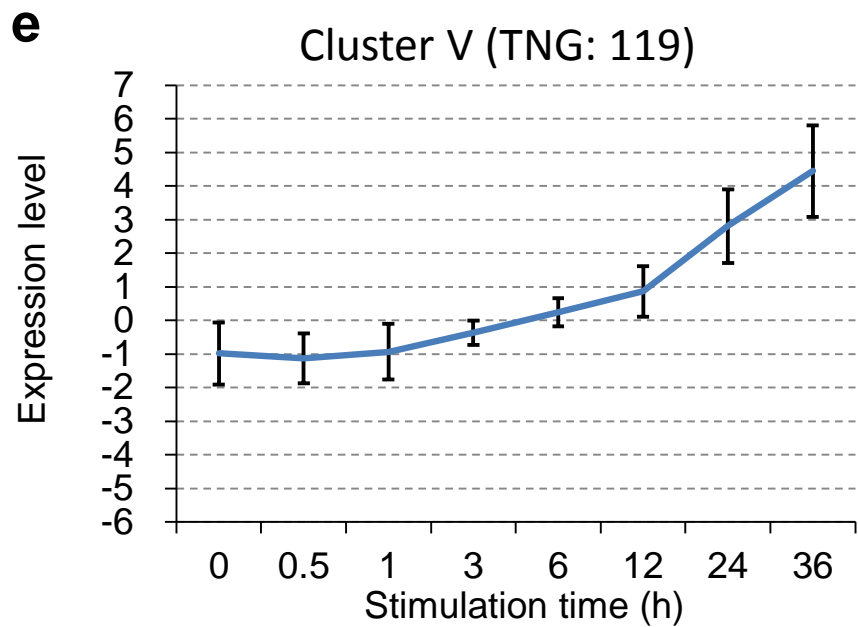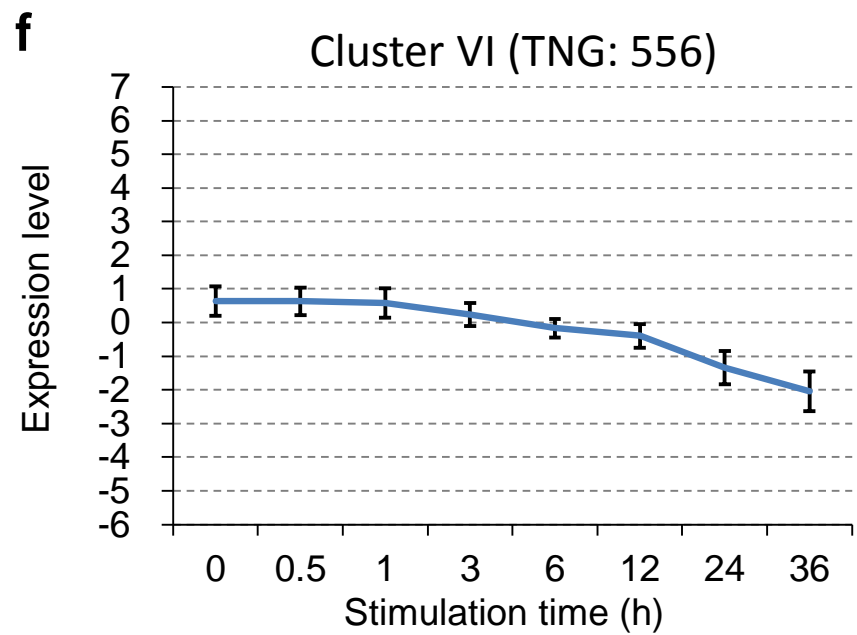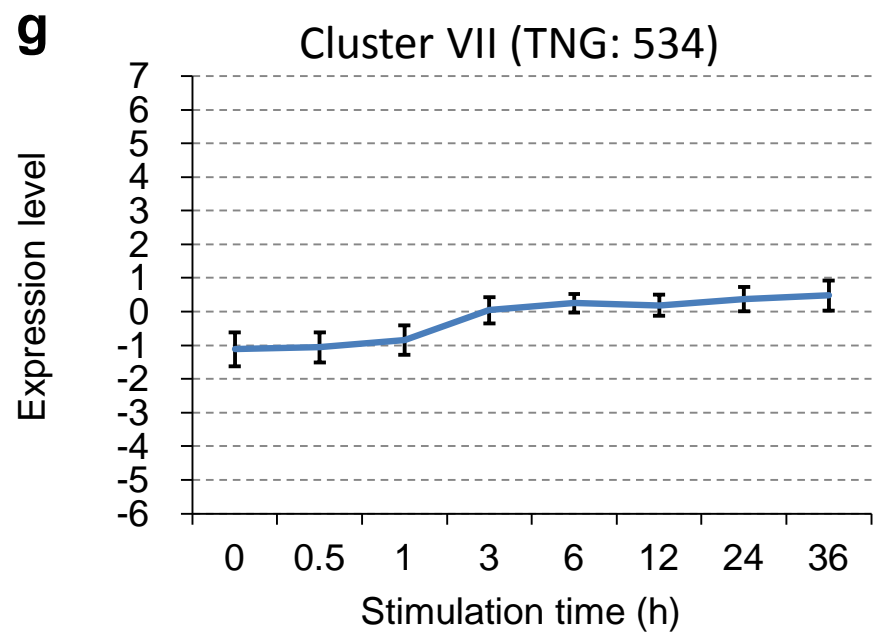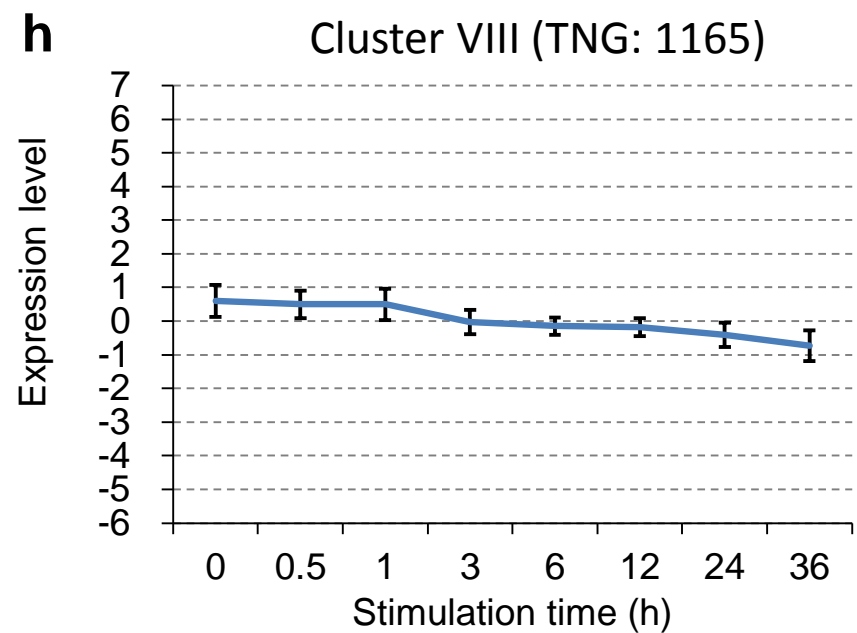

HCA of the Time Course of Gene Expression Related to Phenylalanine, Tyrosine, Tryptophan Biosynthesis (Cf. KEGG map00400)

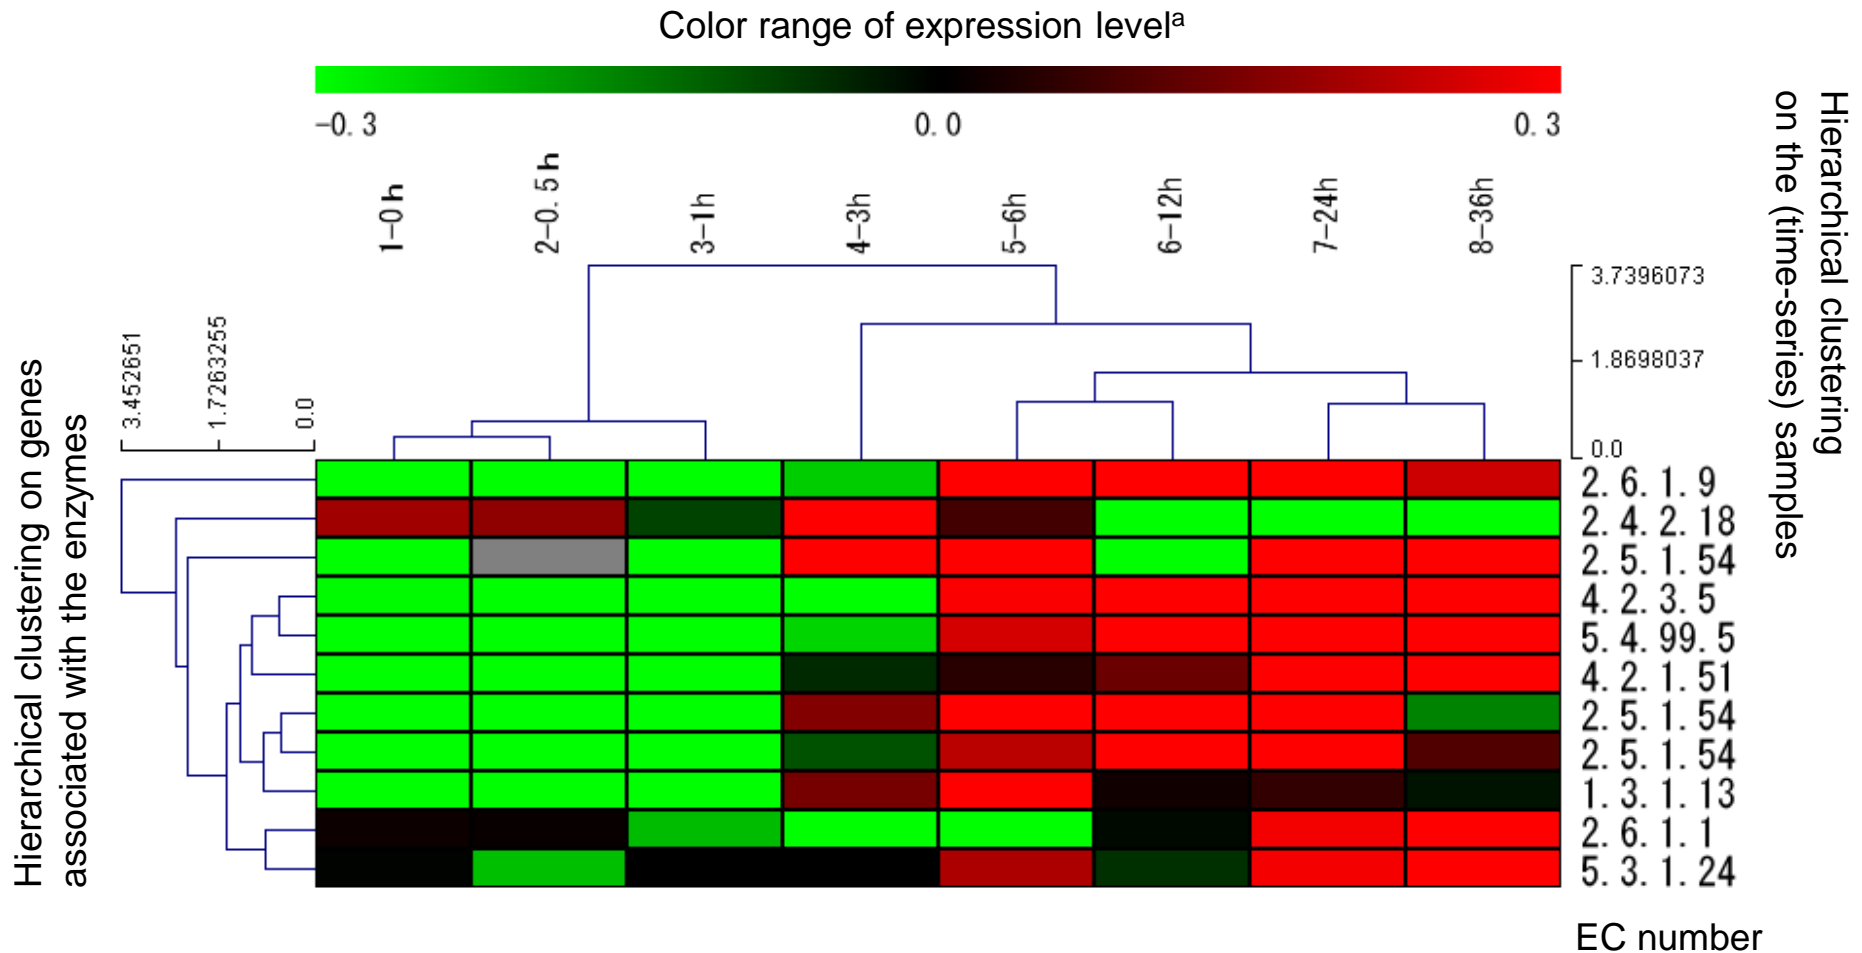

<sup>a</sup>Red and green cells indicate the ratio of each expression level above and below the median, respectively.

Supplementary Fig. S3a

# HCA of the Time Course of Gene Expression Related to Glycolysis/Gluconeogenesis (Cf. KEGG map00010)

Color range of expression level<sup>a</sup>

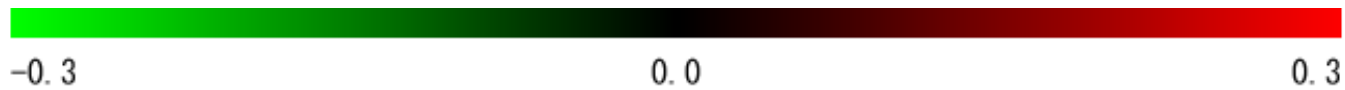

1-0 h      2-0.5 h      3-1h      4-3h      5-6h      6-12h      7-24h      8-36h

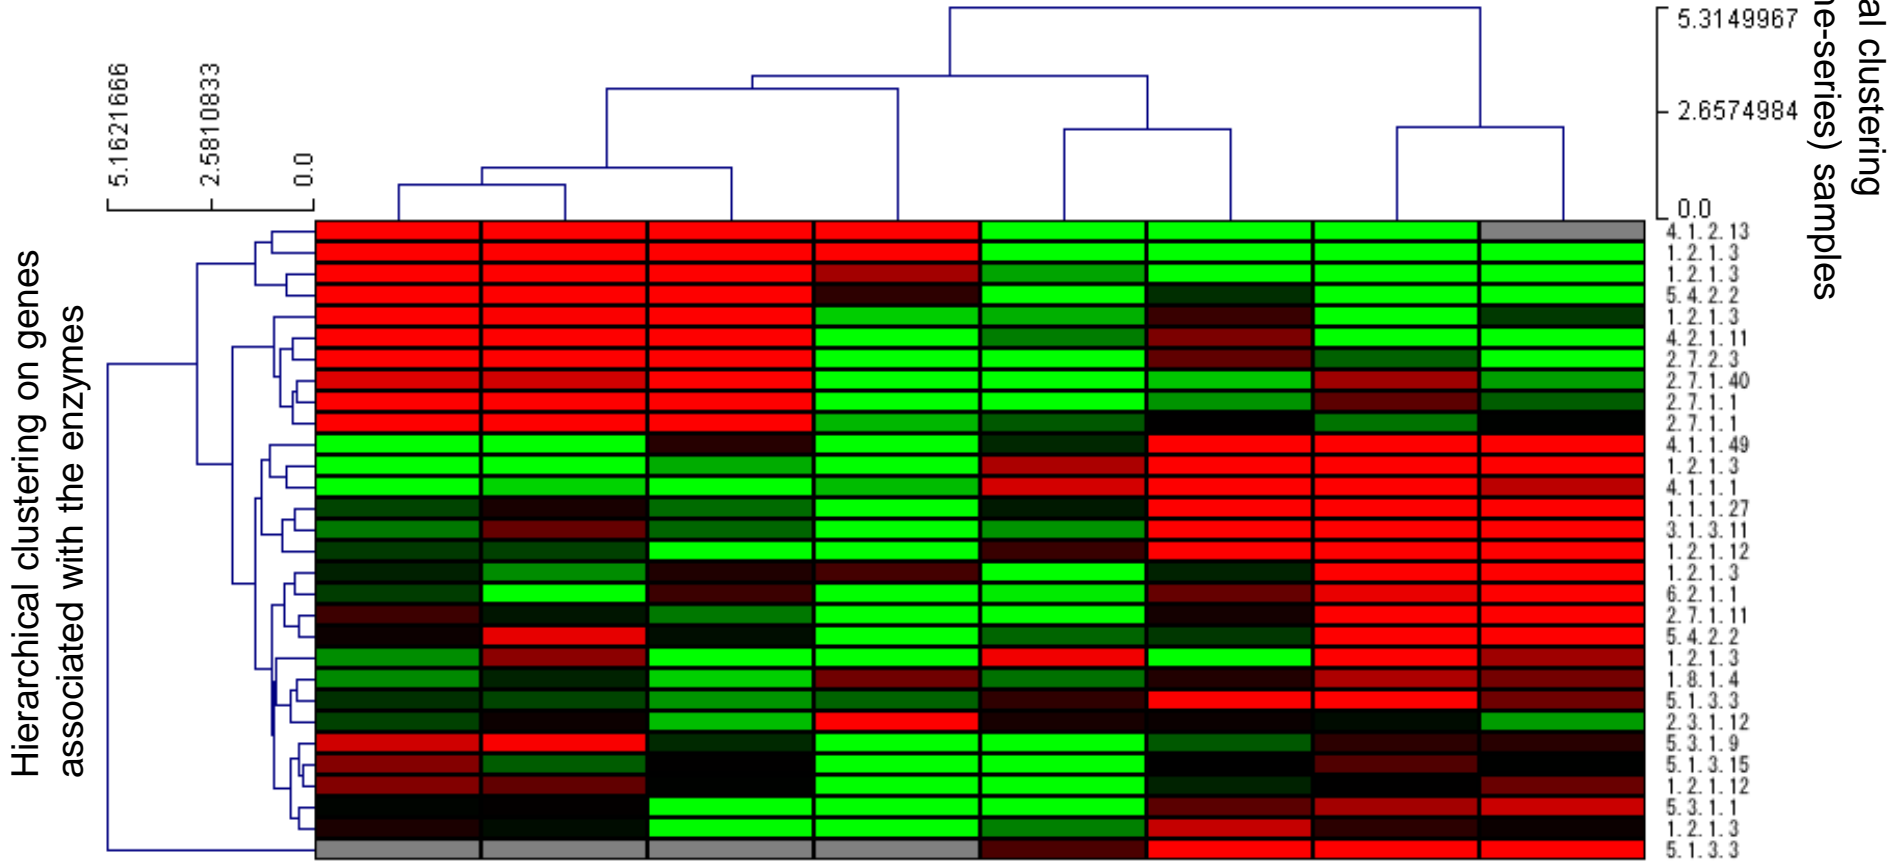

Hierarchical clustering on the (time-series) samples

Hierarchical clustering on genes associated with the enzymes

5.3149967  
2.6574984  
0.0  
4.1.2.13  
1.2.1.3  
1.2.1.3  
5.4.2.2  
1.2.1.3  
4.2.1.11  
2.7.2.3  
2.7.1.40  
2.7.1.1  
2.7.1.1  
4.1.1.49  
1.2.1.3  
4.1.1.1  
1.1.1.27  
3.1.3.11  
1.2.1.12  
1.2.1.3  
6.2.1.1  
2.7.1.11  
5.4.2.2  
1.2.1.3  
1.8.1.4  
5.1.3.3  
2.3.1.12  
5.3.1.9  
5.1.3.15  
1.2.1.12  
5.3.1.1  
1.2.1.3  
5.1.3.3

<sup>a</sup>Red and green cells indicate the ratio of each expression level above and below the median, respectively.

EC number

**Supplementary Fig. S3b**



# HCA of the Time Course of Gene Expression Related to the Pentose Phosphate Pathway (Cf. KEGG map00030)

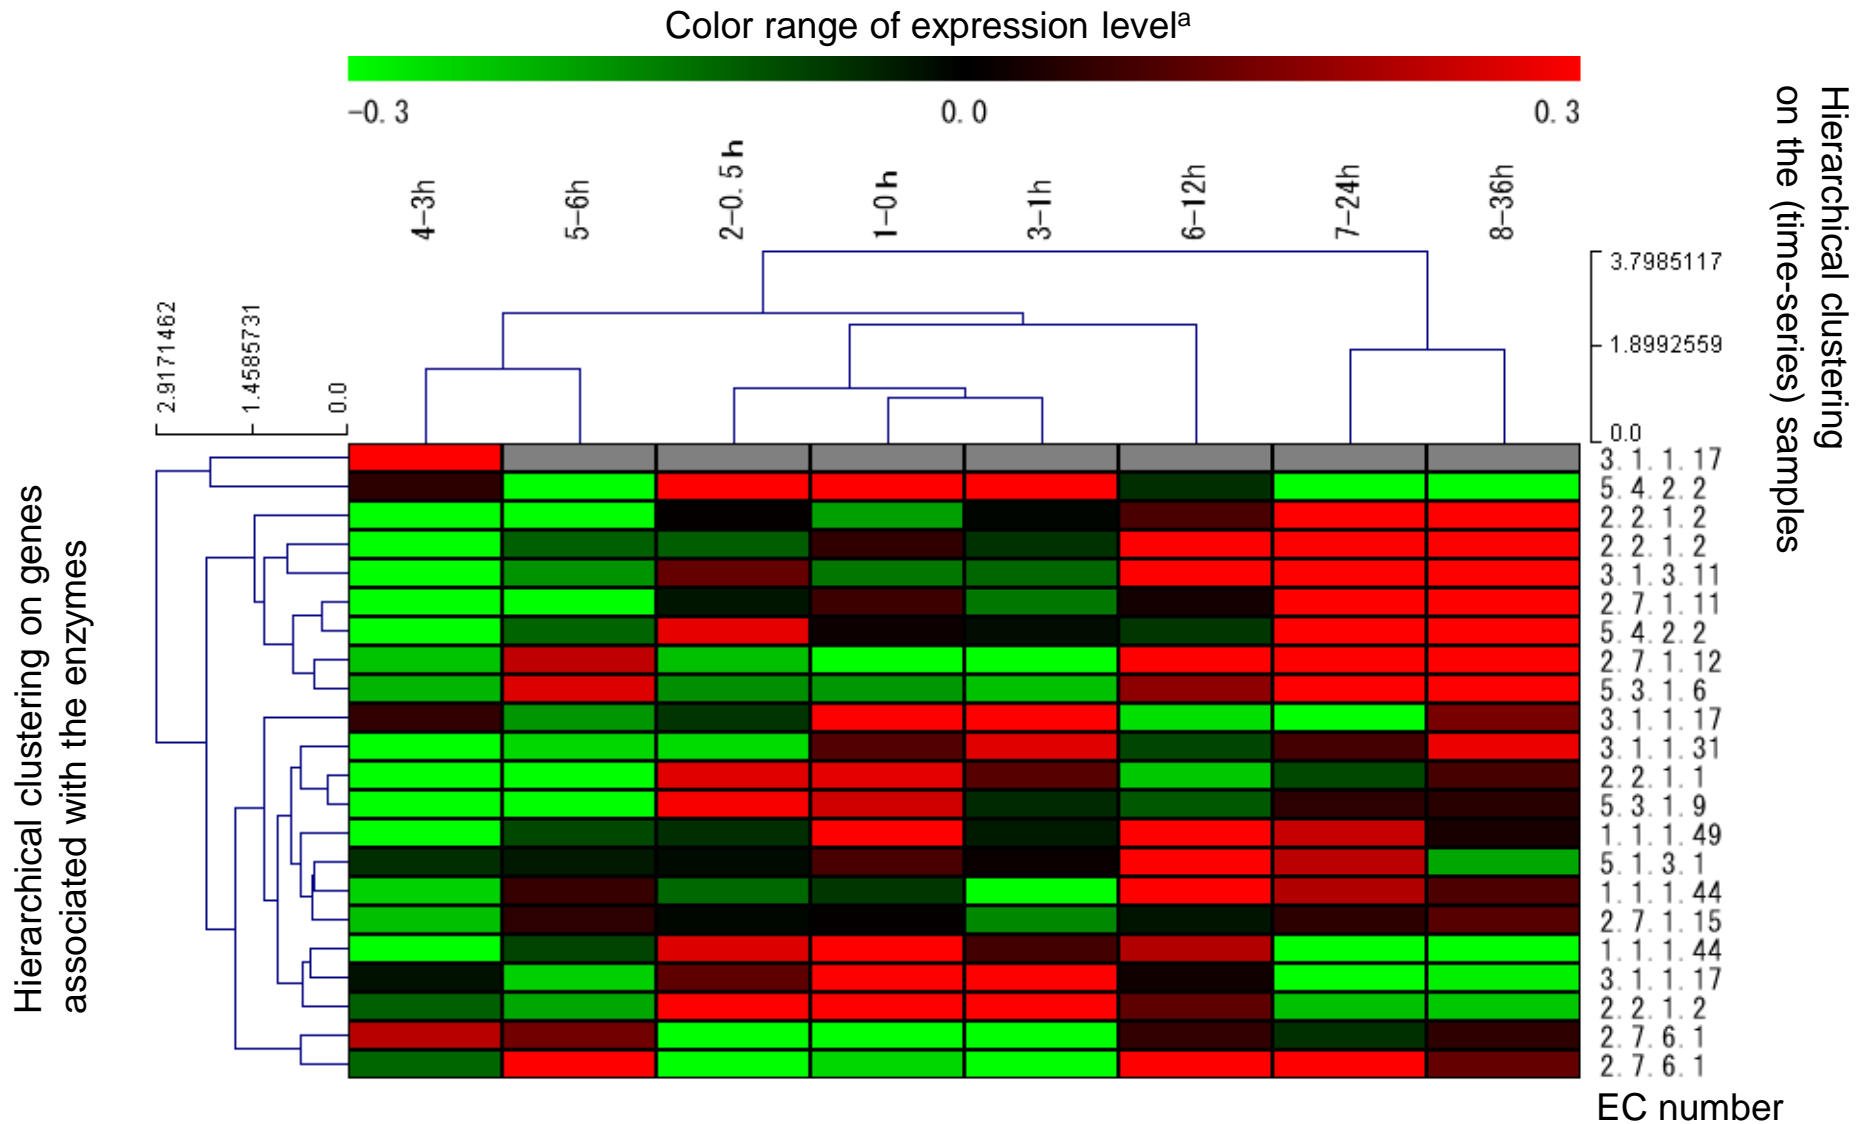

<sup>a</sup>Red and green cells indicate the ratio of each expression level above and below the median, respectively.

**Supplementary Fig. S3c**

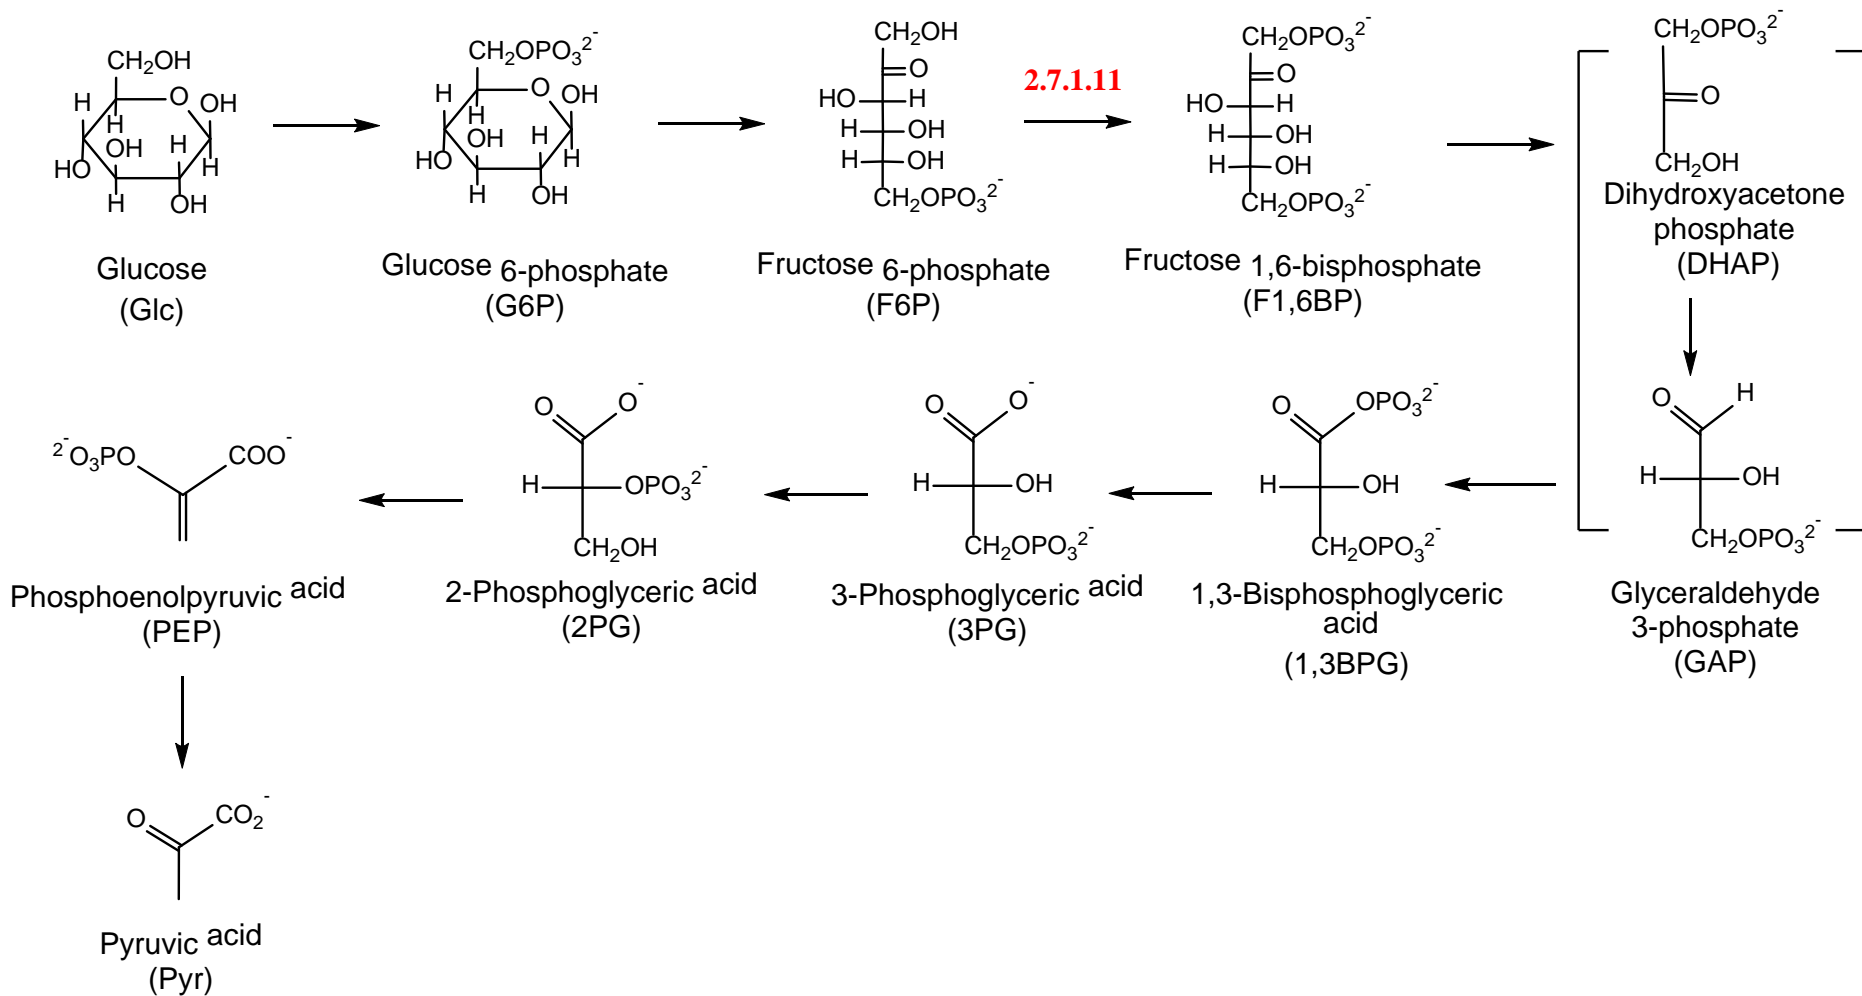

**Supplementary Fig. S4**

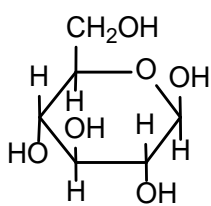

Glucose  
(Glu)

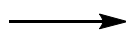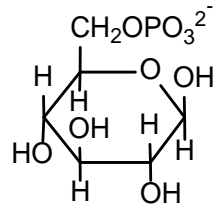

Glucose 6-phosphate  
(G6P)

1.1.1.49

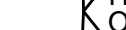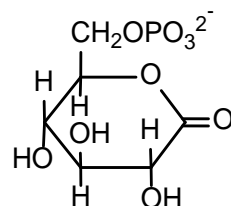

6-Phosphogluconolactone

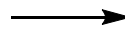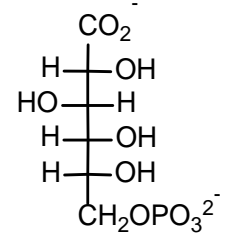

6-phosphogluconic acid

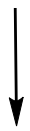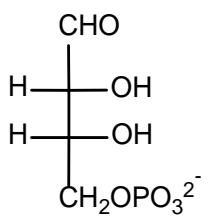

Erythrose 4-phosphate  
(E4P)

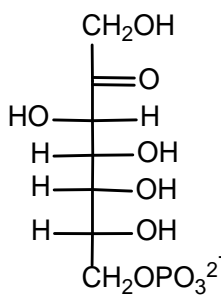

Sedoheptulose  
7-phosphate  
(S7P)

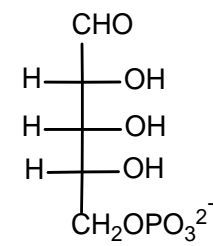

Ribose 5-phosphate  
(R5P)

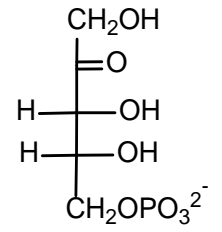

Ribulose 5-phosphate  
(Ru5P)

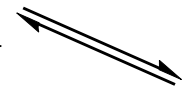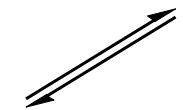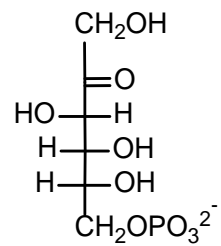

Fructose 6-phosphate  
(F6P)

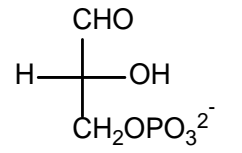

Glyceraldehyde  
3-phosphate  
(GAP)

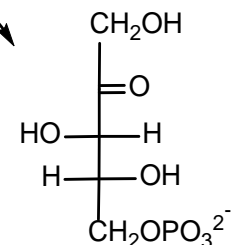

Xylulose 5-phosphate  
(Xu5P)

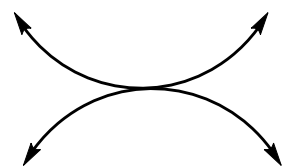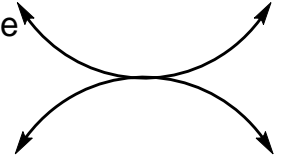

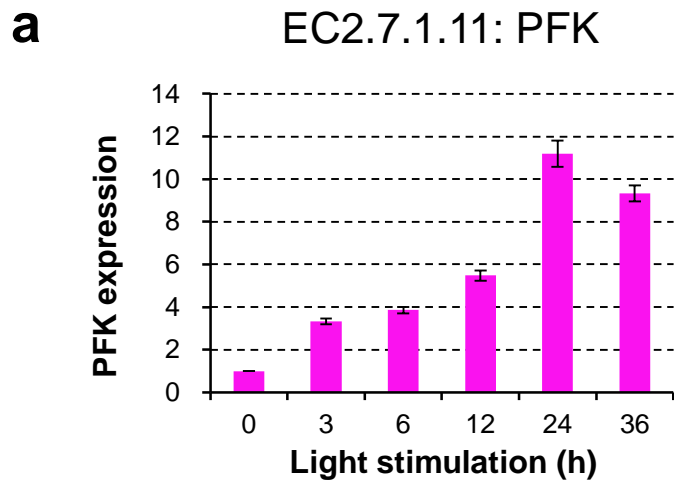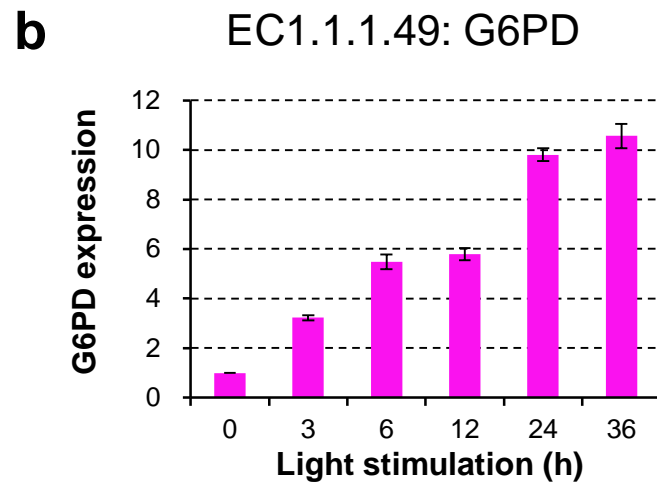

EC2.5.1.54: DAHPS

---

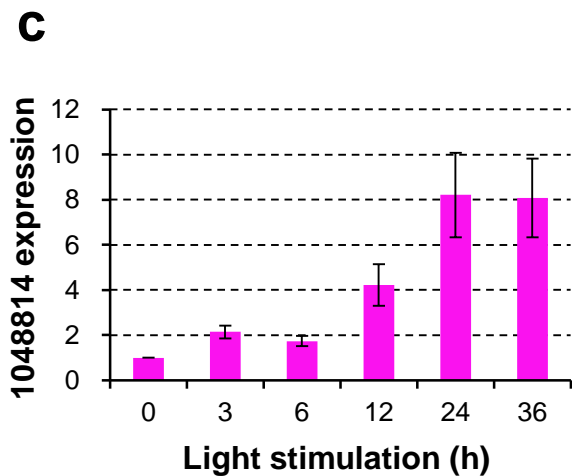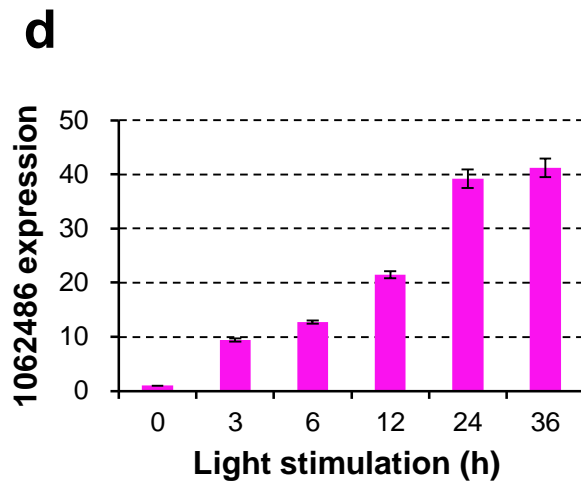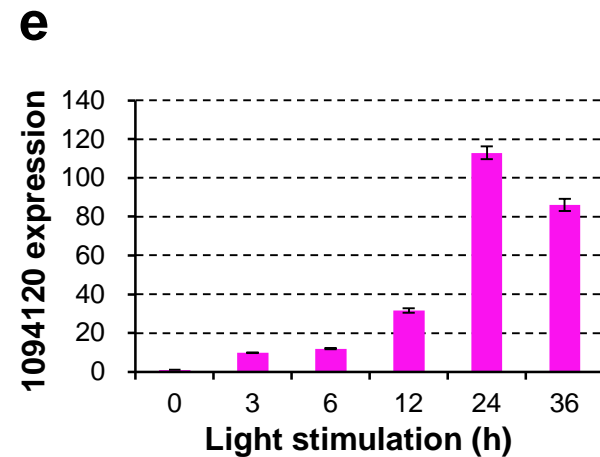

**Supplementary Table S1.** HCA of the Time Course Induction of 212 Primary Metabolites Induced by Blue Light Stimulation

| NO. | Compound name                                        | Blue-Light Stimulation Time vs Standardized Score |       |       |       |       | Dark  |
|-----|------------------------------------------------------|---------------------------------------------------|-------|-------|-------|-------|-------|
|     |                                                      | 0 h                                               | 6 h   | 12 h  | 24 h  | 36 h  | 36 h  |
| 1   | γ-Glu-2-aminobutyric acid                            | 2.04                                              | -0.29 | -0.36 | -0.50 | -0.47 | -0.42 |
| 2   | Phosphorylcholine                                    | 2.03                                              | -0.33 | -0.42 | -0.57 | -0.46 | -0.26 |
| 3   | XC0016 (Unknown)                                     | 2.03                                              | -0.24 | -0.58 | -0.47 | -0.36 | -0.38 |
| 4   | NADPH_divalent                                       | 2.02                                              | -0.36 | -0.39 | -0.53 | -0.56 | -0.18 |
| 5   | N-Acetylglutamic acid                                | 2.02                                              | -0.17 | -0.52 | -0.58 | -0.36 | -0.39 |
| 6   | Citrulline                                           | 2.01                                              | -0.15 | -0.27 | -0.58 | -0.50 | -0.51 |
| 7   | 2-Isopropylmalic acid                                | 2.01                                              | -0.39 | -0.49 | -0.55 | -0.52 | -0.06 |
| 8   | 2-Aminobutyric acid                                  | 1.99                                              | -0.18 | -0.30 | -0.82 | -0.33 | -0.35 |
| 9   | XA0033 (Unknown)                                     | 1.98                                              | -0.29 | -0.41 | -0.72 | -0.54 | -0.03 |
| 10  | 3-Hydroxybutyric acid                                | 1.97                                              | 0.00  | -0.69 | -0.60 | -0.46 | -0.23 |
| 11  | N6-Acetylysine                                       | 1.97                                              | -0.36 | -0.11 | -0.63 | -0.13 | -0.75 |
| 12  | S-Adenosylmethionine                                 | 1.97                                              | -0.29 | -0.44 | -0.78 | -0.49 | 0.03  |
| 13  | N-Acetylmethionine                                   | 1.97                                              | -0.09 | -0.24 | -0.69 | -0.73 | -0.22 |
| 14  | Fructose 1,6-diphosphate                             | 1.96                                              | 0.01  | -0.38 | -0.71 | -0.68 | -0.21 |
| 15  | Cystathionine                                        | 1.96                                              | -0.30 | -0.07 | -0.89 | -0.25 | -0.46 |
| 16  | Adenylosuccinic acid                                 | 1.94                                              | -0.43 | -0.54 | -0.59 | -0.60 | 0.22  |
| 17  | Lys                                                  | 1.93                                              | -0.25 | 0.12  | -0.34 | -0.72 | -0.74 |
| 18  | myo-Inositol 2-phosphate                             | 1.91                                              | -0.98 | -0.41 | -0.07 | -0.01 | -0.45 |
| 19  | Saccharopine                                         | 1.91                                              | 0.25  | -0.39 | -0.69 | -0.75 | -0.34 |
| 20  | Hypotaurine                                          | 1.89                                              | -0.17 | -0.35 | -1.07 | 0.05  | -0.35 |
| 21  | Hexanoic acid                                        | 1.89                                              | -0.44 | -0.44 | -0.58 | -0.78 | 0.34  |
| 22  | N-Acetylglucosamine 6-phosphate                      | 1.89                                              | -0.19 | -0.45 | -0.83 | -0.67 | 0.25  |
| 23  | Argininosuccinic acid                                | 1.89                                              | -0.29 | -0.58 | -0.65 | -0.70 | 0.33  |
| 24  | Uric acid                                            | 1.86                                              | -0.27 | -0.63 | -0.74 | -0.60 | 0.38  |
| 25  | Ornithine                                            | 1.86                                              | -0.55 | -0.33 | 0.16  | -1.05 | -0.09 |
| 26  | 5-Aminovaleric acid                                  | 1.82                                              | -0.30 | 0.35  | -0.61 | -0.25 | -1.01 |
| 27  | Betaine                                              | 1.81                                              | -0.41 | -0.78 | -0.51 | -0.63 | 0.53  |
| 28  | β-Ala                                                | 1.78                                              | -0.40 | -0.70 | -0.80 | -0.46 | 0.58  |
| 29  | Ophthalmic acid                                      | 1.77                                              | -0.05 | -0.02 | -0.67 | 0.14  | -1.17 |
| 30  | Choline                                              | 1.75                                              | -0.22 | -0.21 | -1.27 | 0.31  | -0.36 |
| 31  | Glucose 1-phosphate                                  | 1.75                                              | -0.21 | -0.52 | -0.74 | -0.87 | 0.58  |
| 32  | His                                                  | 1.75                                              | -0.10 | 0.53  | -0.72 | -0.52 | -0.94 |
| 33  | N-Acetylserine                                       | 1.71                                              | 0.32  | -0.55 | -0.68 | -1.07 | 0.27  |
| 34  | UMP                                                  | 1.69                                              | 0.25  | -0.29 | -0.81 | -1.12 | 0.29  |
| 35  | Betaine aldehyde_+H2O                                | 1.68                                              | 0.04  | 0.05  | -0.90 | 0.26  | -1.14 |
| 36  | Glucose 6-phosphate                                  | 1.68                                              | 0.14  | -0.28 | -0.93 | -1.02 | 0.41  |
| 37  | m-Hydroxybenzoic acid                                | 1.68                                              | -0.67 | -0.73 | -0.80 | -0.19 | 0.72  |
| 38  | Butyrylcarnitine                                     | 1.67                                              | 0.25  | -0.38 | -1.36 | -0.37 | 0.18  |
| 39  | Arg                                                  | 1.67                                              | 0.11  | -0.27 | 0.09  | -1.45 | -0.16 |
| 40  | ADP-glucoseGDP-fucose                                | 1.65                                              | -0.07 | -0.26 | -0.98 | -0.94 | 0.59  |
| 41  | 3-Aminobutyric acid                                  | 1.65                                              | 0.28  | 0.48  | -0.70 | -0.79 | -0.93 |
| 42  | O-Phosphoserine                                      | 1.63                                              | -0.24 | -0.62 | -0.69 | -0.88 | 0.80  |
| 43  | S-Adenosylhomocysteine                               | 1.61                                              | -0.90 | -0.41 | -0.07 | 0.72  | -0.95 |
| 44  | Threonic acid                                        | 1.60                                              | -0.17 | -0.78 | -0.89 | -0.58 | 0.82  |
| 45  | Fructose 6-phosphate                                 | 1.60                                              | 0.17  | -0.22 | -0.99 | -1.06 | 0.50  |
| 46  | Sucrose 6'-phosphate                                 | 1.59                                              | -0.09 | -0.53 | -0.81 | -0.95 | 0.79  |
| 47  | Uracil                                               | 1.58                                              | -1.03 | -1.13 | 0.04  | 0.19  | 0.35  |
| 48  | 3-Phosphoglyceric acid                               | 1.58                                              | 0.69  | -0.35 | -1.00 | -0.95 | 0.03  |
| 49  | N,N-Dimethylhistidine                                | 1.57                                              | 0.12  | 0.65  | -0.86 | -0.38 | -1.11 |
| 50  | Carboxymethyllysine                                  | 1.56                                              | 0.08  | 0.39  | -0.40 | -0.12 | -1.49 |
| 51  | 3-Aminoisobutyric acid                               | 1.56                                              | 0.16  | -0.68 | -1.09 | -0.65 | 0.70  |
| 52  | Homocitrulline                                       | 1.50                                              | 0.28  | 0.55  | -0.19 | -1.11 | -1.04 |
| 53  | XC0089 (Unknown)                                     | 1.49                                              | -0.69 | -0.61 | -0.60 | -0.66 | 1.07  |
| 54  | Glycerol 3-phosphate                                 | 1.46                                              | 0.11  | -0.85 | -0.42 | -1.13 | 0.82  |
| 55  | CDP-choline                                          | 1.41                                              | -0.43 | -0.25 | -0.72 | -1.06 | 1.05  |
| 56  | Pro                                                  | 1.38                                              | -0.09 | 0.24  | -0.60 | 0.60  | -1.52 |
| 57  | Dihydroxyacetone phosphate                           | 1.33                                              | 0.95  | -0.11 | -1.18 | -0.95 | -0.05 |
| 58  | UDP-glucoseUDP-galactose                             | 1.33                                              | 0.01  | -0.44 | -0.97 | -0.99 | 1.06  |
| 59  | Ergothioneine                                        | 1.31                                              | -0.14 | -0.53 | -1.03 | -0.77 | 1.16  |
| 60  | myo-Inositol 1-phosphate<br>myo-Inositol 3-phosphate | 1.29                                              | 0.18  | -0.90 | -0.30 | -1.23 | 0.95  |
| 61  | UDP-glucuronic acid                                  | 1.29                                              | 0.19  | -0.23 | -1.12 | -1.06 | 0.93  |
| 62  | Sedoheptulose 7-phosphate                            | 1.26                                              | 0.12  | -0.40 | -0.87 | -1.17 | 1.06  |
| 63  | Uridine                                              | 1.26                                              | -1.20 | -1.17 | 0.71  | 0.26  | 0.15  |
| 64  | N-Acetylneuraminic acid                              | 1.24                                              | -1.14 | -0.86 | 0.78  | -0.64 | 0.62  |
| 65  | 2-Phosphoglyceric acid                               | 1.23                                              | 1.07  | -0.09 | -1.23 | -0.90 | -0.08 |
| 66  | Homoserine                                           | 1.22                                              | -0.92 | -0.13 | -0.07 | 1.10  | -1.20 |
| 67  | dATP                                                 | 1.12                                              | -0.64 | -0.64 | -0.64 | -0.64 | 1.45  |
| 68  | dTDP                                                 | 1.12                                              | -0.88 | 0.42  | -0.88 | -0.88 | 1.11  |
| 69  | Histidinol                                           | 1.06                                              | -0.48 | -0.78 | -0.71 | -0.57 | 1.48  |
| 70  | Erythrose 4-phosphate                                | 1.05                                              | 0.09  | -0.30 | 0.05  | -1.75 | 0.86  |
| 71  | Sebacic acid                                         | 1.04                                              | -0.62 | -0.79 | -0.55 | -0.58 | 1.51  |

|     |                                                          |       |       |       |       |       |       |
|-----|----------------------------------------------------------|-------|-------|-------|-------|-------|-------|
| 72  | GDP                                                      | 1.03  | 0.44  | 0.25  | -0.98 | -1.48 | 0.74  |
| 73  | UDP                                                      | 0.99  | 0.81  | -0.01 | -1.22 | -1.21 | 0.65  |
| 74  | dTTP                                                     | 0.98  | -0.63 | -0.63 | -0.63 | -0.63 | 1.56  |
| 75  | Hydroxyproline                                           | 0.98  | 0.27  | 0.44  | 0.29  | -0.06 | -1.92 |
| 76  | Cys                                                      | 0.94  | -0.20 | 1.46  | -1.16 | -0.34 | -0.71 |
| 77  | Adenine                                                  | 0.93  | 0.20  | -1.12 | -1.12 | 1.25  | -0.15 |
| 78  | GMP                                                      | 0.93  | -1.41 | -0.38 | 1.18  | 0.37  | -0.69 |
| 79  | 10-Hydroxydecanoic acid                                  | 0.89  | -0.34 | -0.77 | -0.57 | -0.80 | 1.59  |
| 80  | CoA_divalent                                             | 0.86  | -0.28 | 1.53  | -1.10 | -0.74 | -0.26 |
| 81  | UTP                                                      | 0.86  | 0.56  | -0.28 | -1.15 | -1.12 | 1.14  |
| 82  | Citric acid                                              | 0.85  | 0.05  | -0.40 | -1.11 | -0.85 | 1.47  |
| 83  | Ribulose 5-phosphate                                     | 0.78  | 0.88  | -0.72 | -0.96 | -1.03 | 1.05  |
| 84  | Glutathione (GSH)                                        | 0.75  | -0.56 | -0.52 | -0.49 | -0.86 | 1.69  |
| 85  | GABA                                                     | 0.73  | -0.71 | -1.25 | -0.68 | 1.20  | 0.70  |
| 86  | 2-Aminoadipic acid                                       | 0.71  | -0.32 | 1.62  | -0.17 | -1.03 | -0.81 |
| 87  | 6-Phosphogluconic acid                                   | 0.71  | 0.07  | 0.08  | -0.81 | -1.41 | 1.36  |
| 88  | N-Formylaspartic acid                                    | 0.71  | -0.36 | 0.57  | 0.28  | -1.88 | 0.67  |
| 89  | Pantothenic acid                                         | 0.64  | -0.61 | -0.80 | -0.39 | -0.60 | 1.75  |
| 90  | O-Succinylhomoserine                                     | 0.58  | 0.79  | 0.89  | 0.20  | -0.95 | -1.52 |
| 91  | Val                                                      | 0.56  | -0.10 | 0.20  | -0.54 | 1.42  | -1.53 |
| 92  | GTP                                                      | 0.56  | 0.69  | 0.05  | -1.07 | -1.34 | 1.12  |
| 93  | Creatine                                                 | 0.44  | 0.14  | -0.76 | -0.91 | -0.64 | 1.73  |
| 94  | Ethanolamine                                             | 0.38  | -0.96 | -1.41 | 0.13  | 0.64  | 1.22  |
| 95  | ATP                                                      | 0.36  | 0.64  | 0.17  | -1.06 | -1.34 | 1.23  |
| 96  | Malic acid                                               | 0.23  | 0.02  | -0.39 | -0.54 | -1.12 | 1.80  |
| 97  | N-Acetylaspartic acid                                    | 0.21  | -0.50 | -0.48 | -0.58 | 1.95  | -0.59 |
| 98  | Cadaverine                                               | 0.19  | 0.89  | 1.01  | -0.95 | 0.33  | -1.47 |
| 99  | FAD_divalent                                             | 0.18  | -0.64 | -0.73 | -0.43 | -0.31 | 1.93  |
| 100 | Trp                                                      | 0.18  | -0.73 | 0.02  | -0.60 | -0.74 | 1.88  |
| 101 | 2-Methylserine                                           | 0.13  | -0.39 | -0.80 | -0.71 | -0.15 | 1.92  |
| 102 | ADP                                                      | 0.10  | 0.66  | 0.77  | -0.61 | -1.72 | 0.79  |
| 103 | Glucuronic acid                                          | 0.07  | -0.45 | -0.07 | -0.30 | -1.10 | 1.86  |
| 104 | N-Acetylparagine                                         | 0.06  | 0.80  | 0.51  | -0.82 | -1.55 | 1.01  |
| 105 | Phe                                                      | 0.04  | 0.43  | 0.12  | 0.32  | -1.92 | 1.01  |
| 106 | Leu                                                      | 0.04  | -0.12 | 0.24  | -0.10 | 1.54  | -1.60 |
| 107 | Cytidine                                                 | -0.02 | 0.36  | 0.74  | 1.26  | -1.23 | -1.10 |
| 108 | Carnitine                                                | -0.03 | -0.22 | -0.73 | -0.76 | -0.21 | 1.95  |
| 109 | Asp                                                      | -0.03 | 0.22  | 0.02  | -1.67 | 1.47  | -0.01 |
| 110 | N-Acetylglycine                                          | -0.06 | -0.48 | -0.49 | -0.44 | 2.01  | -0.55 |
| 111 | cGMP                                                     | -0.09 | -0.60 | -0.49 | 0.52  | -1.07 | 1.72  |
| 112 | dTDP-glucose                                             | -0.10 | 0.59  | 0.63  | -1.10 | -1.24 | 1.22  |
| 113 | Fumaric acid                                             | -0.11 | 0.27  | -0.28 | -0.57 | -1.12 | 1.80  |
| 114 | 4-Methyl-2-oxovaleric acid<br>3-Methyl-2-oxovaleric acid | -0.13 | 0.38  | -0.56 | 0.32  | 1.49  | -1.49 |
| 115 | CTP                                                      | -0.14 | 1.37  | 0.26  | -1.10 | -1.13 | 0.74  |
| 116 | UDP-N-acetylglucosamine                                  | -0.21 | 0.79  | 0.48  | -1.05 | -1.24 | 1.21  |
| 117 | XA0002 (Unknown)                                         | -0.21 | -1.93 | 0.39  | 0.47  | 0.52  | 0.76  |
| 118 | CDP                                                      | -0.22 | 1.45  | 0.82  | -0.94 | -1.14 | 0.03  |
| 119 | Trigonelline                                             | -0.23 | -0.52 | -1.17 | -0.38 | 0.64  | 1.66  |
| 120 | Ribose 5-phosphate                                       | -0.23 | 1.89  | -0.04 | -0.70 | -0.95 | 0.04  |
| 121 | N-Acetylmethionine                                       | -0.24 | 0.03  | -0.52 | 1.67  | -1.32 | 0.38  |
| 122 | Terephthalic acid                                        | -0.25 | -0.55 | 1.95  | -0.01 | -0.87 | -0.27 |
| 123 | NMN                                                      | -0.27 | -0.52 | -0.83 | 0.16  | -0.46 | 1.93  |
| 124 | Gln                                                      | -0.29 | -0.51 | -0.36 | 0.15  | -0.91 | 1.92  |
| 125 | Met                                                      | -0.32 | -0.50 | -0.22 | -0.24 | 2.01  | -0.72 |
| 126 | Spermidine                                               | -0.41 | 0.16  | -0.17 | -0.67 | -0.82 | 1.91  |
| 127 | cAMP                                                     | -0.42 | -0.71 | -0.71 | 1.06  | -0.71 | 1.48  |
| 128 | 3-Hydroxy-3-methylglutaric acid                          | -0.43 | -0.55 | -0.22 | 0.00  | 1.97  | -0.77 |
| 129 | Tryptamine                                               | -0.45 | -0.62 | -0.66 | -0.08 | -0.17 | 1.98  |
| 130 | Oxypurinol                                               | -0.45 | -0.54 | -0.56 | -0.15 | 2.02  | -0.32 |
| 131 | 5-Oxoproline                                             | -0.49 | -0.39 | -1.35 | 1.37  | 0.95  | -0.09 |
| 132 | N-Acetylleucine                                          | -0.50 | -0.79 | -0.38 | 0.87  | 1.60  | -0.80 |
| 133 | Pipecolic acid                                           | -0.51 | 0.21  | 1.28  | 0.97  | -0.65 | -1.30 |
| 134 | Trimethylamine                                           | -0.52 | -0.64 | -0.70 | 0.73  | 1.72  | -0.58 |
| 135 | Trehalose 6-phosphate                                    | -0.53 | 1.00  | 0.29  | -1.46 | 1.15  | -0.45 |
| 136 | 4-Guanidinobutyric acid                                  | -0.54 | -0.67 | -0.71 | 0.38  | -0.33 | 1.87  |
| 137 | XC0040 (Unknown)                                         | -0.56 | -0.01 | -0.02 | -0.08 | -1.16 | 1.83  |
| 138 | 3-Methylhistidine                                        | -0.59 | -0.07 | 0.27  | 0.53  | -1.53 | 1.39  |
| 139 | Isocitric acid                                           | -0.60 | -0.52 | -0.08 | -0.47 | 2.01  | -0.33 |
| 140 | CMP-N-acetylneuraminate                                  | -0.60 | -1.18 | -0.40 | 0.69  | 1.61  | -0.11 |
| 141 | $\beta$ -Ala-Lys                                         | -0.61 | -0.67 | -0.77 | 1.24  | -0.52 | 1.33  |
| 142 | Phenylpyruvic acid                                       | -0.62 | -0.58 | -0.30 | -0.41 | 2.00  | -0.10 |
| 143 | cCMP2',3'-cCMP                                           | -0.62 | -0.62 | -0.62 | 1.66  | -0.62 | 0.84  |
| 144 | XA0004 (Unknown)                                         | -0.64 | 0.06  | -0.65 | 0.99  | -1.14 | 1.37  |
| 145 | Glucosaminic acid                                        | -0.65 | -0.83 | -0.80 | 0.20  | 1.76  | 0.31  |
| 146 | Galacturonic acid                                        | -0.67 | -0.75 | 0.03  | 0.67  | 1.64  | -0.92 |
| 147 | 3-Hydroxypropionic acid                                  | -0.68 | -0.78 | 0.44  | 1.83  | -0.23 | -0.58 |
| 148 | 2,4-Diaminobutyric acid                                  | -0.68 | 0.96  | -0.57 | 1.41  | -1.14 | 0.03  |

|     |                                 |       |       |       |       |       |       |
|-----|---------------------------------|-------|-------|-------|-------|-------|-------|
| 149 | 2-Phenylethylamine              | -0.69 | -0.47 | -0.45 | 1.99  | -0.01 | -0.37 |
| 150 | Lactic acid                     | -0.71 | -0.43 | -0.37 | -0.26 | -0.24 | 2.01  |
| 151 | SDMA                            | -0.72 | -1.05 | 0.25  | 1.04  | 1.27  | -0.78 |
| 152 | Inosine                         | -0.75 | -0.46 | 0.05  | 0.63  | 1.62  | -1.09 |
| 153 | AMP                             | -0.78 | -0.66 | 0.53  | 1.81  | -0.40 | -0.50 |
| 154 | Putrescine                      | -0.78 | 1.08  | 0.50  | 1.08  | -0.85 | -1.03 |
| 155 | Ile                             | -0.79 | -0.09 | 0.36  | 0.23  | 1.58  | -1.30 |
| 156 | Imidazole-4-acetic acid         | -0.80 | 0.88  | 1.06  | 0.62  | -1.39 | -0.37 |
| 157 | γ-Butyrobetaine                 | -0.80 | -1.00 | 0.00  | -0.33 | 1.76  | 0.37  |
| 158 | 4-Acetamidobutanoic acid        | -0.83 | 0.36  | -0.38 | -0.02 | -0.92 | 1.79  |
| 159 | Formylanthranilic acid          | -0.84 | -0.47 | -0.24 | 0.33  | 1.87  | -0.65 |
| 160 | trans-Glutaconic acid           | -0.84 | 0.70  | 0.27  | -0.70 | -0.96 | 1.52  |
| 161 | Adenosine                       | -0.86 | -0.62 | -0.32 | 1.45  | 1.07  | -0.72 |
| 162 | Shikimic acid                   | -0.87 | -0.58 | 0.09  | 0.55  | 1.68  | -0.88 |
| 163 | Glutathione (GSSG)_divalent     | -0.88 | -0.77 | -0.25 | 0.58  | 1.75  | -0.43 |
| 164 | ADMA                            | -0.89 | -0.65 | -0.09 | 1.39  | 1.07  | -0.84 |
| 165 | Digalacturonic acid             | -0.89 | 0.13  | -0.28 | 1.39  | -1.20 | 0.86  |
| 166 | Nω-Methylarginine               | -0.89 | -0.16 | 0.61  | 1.72  | -0.50 | -0.78 |
| 167 | CMP                             | -0.91 | 1.45  | 1.08  | -0.43 | -0.48 | -0.71 |
| 168 | Cysteine glutathione disulfide  | -0.94 | 0.00  | 0.21  | 0.29  | 1.62  | -1.17 |
| 169 | Ala-Ala                         | -0.95 | -0.13 | -0.25 | 1.88  | -0.68 | 0.13  |
| 170 | Gly                             | -0.95 | -0.41 | -0.02 | 0.29  | 1.82  | -0.73 |
| 171 | Methionine sulfoxide            | -0.96 | -0.43 | -0.40 | 0.84  | 1.61  | -0.66 |
| 172 | Imidazolelactic acid            | -0.98 | 0.31  | 0.95  | 1.32  | -0.78 | -0.82 |
| 173 | Ser                             | -0.98 | 0.27  | 0.28  | -0.71 | -0.58 | 1.74  |
| 174 | Isethionic acid                 | -1.02 | -0.50 | -0.14 | 0.38  | -0.53 | 1.81  |
| 175 | Gluconolactone                  | -1.02 | -0.22 | 0.10  | 1.35  | 0.91  | -1.12 |
| 176 | Suberic acid                    | -1.02 | -0.99 | -0.21 | 1.66  | 0.35  | 0.21  |
| 177 | 3'-Dephospho CoA                | -1.03 | -0.66 | 0.00  | 1.72  | 0.51  | -0.54 |
| 178 | XC0017 (Unknown)                | -1.04 | -0.39 | -0.14 | 0.91  | 1.50  | -0.83 |
| 179 | N5-Ethylglutamine               | -1.04 | -0.67 | 0.78  | 1.49  | 0.21  | -0.77 |
| 180 | Succinic acid                   | -1.05 | -0.42 | 0.64  | 1.05  | 0.93  | -1.16 |
| 181 | 2-Hydroxyvaleric acid           | -1.05 | 1.18  | 0.67  | 0.84  | -0.82 | -0.82 |
| 182 | N6,N6,N6-Trimethyllysine        | -1.05 | -0.84 | -0.20 | 1.71  | 0.46  | -0.08 |
| 183 | Gluconic acid                   | -1.06 | -0.21 | 0.17  | 1.41  | 0.79  | -1.09 |
| 184 | Guanine                         | -1.06 | 0.97  | -0.21 | 1.40  | -0.16 | -0.95 |
| 185 | Arg-Glu                         | -1.07 | -0.45 | -0.02 | 1.81  | -0.54 | 0.27  |
| 186 | Glycerophosphocholine           | -1.11 | -0.35 | 0.54  | -0.62 | 1.71  | -0.17 |
| 187 | Allantoic acid                  | -1.12 | -0.87 | 0.02  | 0.73  | -0.29 | 1.54  |
| 188 | Isovalerylcarnitine             | -1.14 | -0.06 | 0.39  | 1.41  | 0.53  | -1.13 |
| 189 | Isobutyrylcarnitine             | -1.15 | 0.22  | 1.18  | 0.22  | 0.79  | -1.26 |
| 190 | N-Acetyllysine                  | -1.15 | -0.22 | 0.20  | 1.83  | -0.28 | -0.38 |
| 191 | O-Acetylcarnitine               | -1.17 | -0.88 | -0.44 | 1.03  | 1.24  | 0.22  |
| 192 | Tyr                             | -1.18 | -0.94 | -0.37 | 0.25  | 0.95  | 1.28  |
| 193 | Sorbitol 6-phosphate            | -1.19 | -0.18 | -0.26 | 0.47  | -0.56 | 1.72  |
| 194 | XC0065 (Unknown)                | -1.20 | -0.31 | 0.21  | 0.76  | 1.43  | -0.89 |
| 195 | Serotonin                       | -1.25 | -0.32 | 0.09  | 1.75  | 0.19  | -0.47 |
| 196 | XC0126 (Unknown)                | -1.28 | -0.31 | -0.02 | 1.08  | 1.26  | -0.72 |
| 197 | Guanosine                       | -1.29 | 0.08  | 0.16  | 1.50  | 0.48  | -0.92 |
| 198 | Glycerol                        | -1.35 | 0.30  | 0.27  | 0.39  | 1.37  | -0.98 |
| 199 | Trimethylamine N-oxide          | -1.37 | 0.62  | -0.98 | 1.28  | 0.15  | 0.31  |
| 200 | N-Acetylglucosamine 1-phosphate | -1.40 | -0.21 | 0.16  | 0.83  | 1.33  | -0.71 |
| 201 | Thr                             | -1.41 | -0.12 | 0.54  | 0.15  | 1.49  | -0.66 |
| 202 | Asn                             | -1.42 | -0.89 | -0.21 | 0.64  | 0.93  | 0.94  |
| 203 | Gly-Asp                         | -1.45 | -0.31 | -0.08 | 1.67  | 0.09  | 0.08  |
| 204 | NAD+                            | -1.46 | -0.32 | -0.40 | -0.05 | 1.31  | 0.93  |
| 205 | Imidazole-4-methanol            | -1.53 | -0.45 | -0.43 | 1.24  | 0.44  | 0.73  |
| 206 | Phthalic acid                   | -1.58 | 0.35  | 1.41  | 0.26  | -0.57 | 0.13  |
| 207 | NADP+                           | -1.60 | -0.38 | 0.57  | 0.88  | 0.99  | -0.46 |
| 208 | Glyceric acid                   | -1.60 | -0.05 | 0.36  | 1.04  | 0.91  | -0.65 |
| 209 | N-Carbamylglutamic acid         | -1.61 | 0.21  | 0.13  | 1.08  | -0.67 | 0.86  |
| 210 | cis-Aconitic acid               | -1.68 | -0.20 | 0.35  | -0.35 | 1.19  | 0.69  |
| 211 | Carnosine                       | -1.81 | -0.19 | 0.16  | 1.18  | 0.13  | 0.52  |
| 212 | Pyruvic acid                    | -1.87 | 0.88  | 0.11  | 0.20  | 0.81  | -0.12 |

**Supplementary Table S2.** Probe Names of Genes Represented in the Custom Microarray, EC Number and the KEGG Orthology (KO) ID of the Corresponding Protein

Phenylalanine, Tyrosine and Tryptophan Biosynthesis Pathway  
(KEGG Map00400)

| EC number | Probe Name             | KEGG ORTHOLOGY (KO) ID |
|-----------|------------------------|------------------------|
| 1.3.1.13  | CUST_1678_PI426540746  | K00211                 |
| 2.4.2.18  | CUST_9044_PI426540746  | K00766                 |
| 2.5.1.54  | CUST_8613_PI426540746  |                        |
|           | CUST_10556_PI426540746 | K01626                 |
|           | CUST_3158_PI426540746  |                        |
| 2.6.1.1   | CUST_741_PI426540746   | K14454                 |
| 2.6.1.9   | CUST_11589_PI426540746 | K00817                 |
| 4.2.1.51  | CUST_3391_PI426540746  | K04518                 |
| 4.2.3.5   | CUST_2990_PI426540746  | K01736                 |
| 5.3.1.24  | CUST_6467_PI426540746  | K13501                 |
| 5.4.99.5  | CUST_8552_PI426540746  | K01850                 |



Glycolysis/Guconeogenesis Pathway  
(KEGG Map00010)

| EC number | Probe Name             | KEGG ORTHOLOGY (KO) ID |
|-----------|------------------------|------------------------|
| 1.1.1.27  | CUST_12058_PI426540746 | K00016                 |
| 1.2.1.12  | CUST_10594_PI426540746 | K00134                 |
|           | CUST_10568_PI426540746 |                        |
|           | CUST_10900_PI426540746 |                        |
|           | CUST_10901_PI426540746 |                        |
| 1.2.1.3   | CUST_401_PI426540746   | K00128                 |
|           | CUST_2225_PI426540746  |                        |
|           | CUST_11032_PI426540746 |                        |
|           | CUST_10890_PI426540746 |                        |
|           | CUST_5033_PI426540746  |                        |
| 1.8.1.4   | CUST_11109_PI426540746 | K00382                 |
| 2.3.1.12  | CUST_3370_PI426540746  | K00627                 |
|           | CUST_4719_PI426540746  |                        |
| 2.7.1.1   | CUST_475_PI426540746   | K00844                 |
|           | CUST_9760_PI426540746  |                        |
| 2.7.1.11  | CUST_9760_PI426540746  | K00850                 |
| 2.7.1.40  | CUST_3597_PI426540746  | K00873                 |
| 2.7.2.3   | CUST_1231_PI426540746  | K00927                 |
| 3.1.3.11  | CUST_832_PI426540746   | K03841                 |
| 4.1.1.1   | CUST_8648_PI426540746  | K01568                 |
| 4.1.1.49  | CUST_6433_PI426540746  | K01610                 |
| 4.1.2.13  | CUST_8389_PI426540746  | K01623                 |
| 4.2.1.11  | CUST_4128_PI426540746  | K01689                 |
|           | CUST_3480_PI426540746  |                        |
| 5.1.3.15  | CUST_3480_PI426540746  | K01792                 |
| 5.1.3.3   | CUST_5430_PI426540746  | K01785                 |
|           | CUST_11314_PI426540746 |                        |
| 5.3.1.1   | CUST_11091_PI426540746 | K01803                 |
| 5.3.1.9   | CUST_6014_PI426540746  | K01810                 |
|           | CUST_1244_PI426540746  |                        |
| 5.4.2.2   | CUST_7339_PI426540746  | K01835                 |
|           | CUST_7339_PI426540746  |                        |
| 6.2.1.1   | CUST_110_PI426540746   | K01895                 |

Pentose Phosphate Pathway  
(KEGG map00030)

| EC number | Probe Name                                                               | KEGG ORTHOLOGY (KO) ID |
|-----------|--------------------------------------------------------------------------|------------------------|
| 1.1.1.44  | CUST_2935_PI426540746<br>CUST_11042_PI426540746                          | K00033                 |
| 1.1.1.49  | CUST_4747_PI426540746                                                    | K00036                 |
| 2.2.1.1   | CUST_1169_PI426540746<br>CUST_8317_PI426540746                           | K00615                 |
| 2.2.1.2   | CUST_11449_PI426540746<br>CUST_1056_PI426540746                          | K00616                 |
| 2.7.1.11  | CUST_9760_PI426540746                                                    | K00850                 |
| 2.7.1.12  | CUST_6006_PI426540746                                                    | K00851                 |
| 2.7.1.15  | CUST_6355_PI426540746                                                    | K00852                 |
| 2.7.6.1   | CUST_3501_PI426540746<br>CUST_3110_PI426540746<br>CUST_11803_PI426540746 | K00948                 |
| 3.1.1.17  | CUST_11809_PI426540746<br>CUST_7102_PI426540746                          | K01053                 |
| 3.1.1.31  | CUST_3275_PI426540746                                                    | K01057                 |
| 3.1.3.11  | CUST_832_PI426540746                                                     | K03841                 |
| 5.1.3.1   | CUST_3595_PI426540746                                                    | K01783                 |
| 5.3.1.6   | CUST_10980_PI426540746                                                   | K01807                 |
| 5.3.1.9   | CUST_6014_PI426540746                                                    | K01810                 |
| 5.4.2.2   | CUST_1244_PI426540746<br>CUST_7339_PI426540746                           | K01835                 |

**Supplementary Table S3.** Forward and Reverse Primers Synthesized for Quantitative PCR Analysis

| EC / Protein ID      | Forward Primer                   | Reverse Primer                   |
|----------------------|----------------------------------|----------------------------------|
| EC2.7.1.11 / 174437  | 5'-TCA GCA ATA ACG TCC CGA TG-3' | 5'-TTG CTT GAT CGC ATC ACA GG-3' |
| EC1.1.1.49 / 1088946 | 5'-ACG TTC AAG GAA CCG TTT GG-3' | 5'-ACC TGC AGC AAA TGG TTC TG-3' |
| EC2.5.1.54 / 1048814 | 5'-ACA CAT CCA AGA TGC GTT CG-3' | 5'-AAT TGC CAT GGG AGC AAT CG-3' |
| EC2.5.1.54 / 1062486 | 5'-TTC TGA GAT CGA ACG CTT GC-3' | 5'-TTT CAT GAG TGC AGG CAT CG-3' |
| EC2.5.1.54 / 1094120 | 5'-ACG CCA AAC TCC TCA AAC AG-3' | 5'-TTG TTC GGG GCT TTT CGA AG-3' |

**Supplementary Table S4.** Peptides Synthesized for Preparation of Polyclonal Primary Antibodies against the Target Proteins

| Target protein                                             | EC / Protein ID      | AMW <sup>a</sup> / kDa | Synthesized peptide |
|------------------------------------------------------------|----------------------|------------------------|---------------------|
| phosphofructokinase (PFK)                                  | EC2.7.1.11 / 174437  | 94.4                   | CDNPGTTNYGEGTGQDTE  |
| glucose-6-phosphate dehydrogenase (G6PD)                   | EC1.1.1.49 / 1088946 | 56.5                   | SDSGTIPSMETSHDEC    |
| 3-deoxy-D-arabinoheptulosonate 7-phosphate (DAHP) synthase | EC2.5.1.54 / 1048814 | 43.9                   | MGKPLVPDFSDDEKVC    |
| 3-deoxy-D-arabinoheptulosonate 7-phosphate (DAHP) synthase | EC2.5.1.54 / 1062486 | 54.1                   | CEQNNLLYSELGGRERKP  |
| 3-deoxy-D-arabinoheptulosonate 7-phosphate (DAHP) synthase | EC2.5.1.54 / 1094120 | 40.7                   | CRQGVRRGRRELLKKQARP |

<sup>a</sup>Average molecular weight
